# Supplementary material for: Heterotopic silver–NHC complexes: from coordination polymers to supramolecular assemblies
Source: Royal Society of Chemistry journal article supplement (doi:10.1039/c003352a), 2010-01-01

## **Heterotopic Silver-NHC complexes: From coordination polymers to supramolecular assemblies.**

Miguel Rubio,<sup>a</sup> Maxime A. Siegler,<sup>b</sup> Anthony L. Spek,<sup>b</sup> Joost N. H. Reek<sup>a\*</sup>

<sup>a</sup> *Van't Hoff Institute for Molecular Sciences, University of Amsterdam, Nieuwe Achtergracht 166, 1018WV, Amsterdam (The Netherlands). Fax: +31 20 5255604; Tel: +31 20 5255265; E-mail: reek@science.uva.nl*

<sup>b</sup> *Bijvoet Center for Biomolecular Research, Utrecht (The Netherlands). Fax: +31 30 2533940; Tel: +31 30 2532538; E-mail: a.l.spek@uu.nl*

**General Procedures.** All solvents were distilled under nitrogen in the presence of the following dessicants: sodium benzophenone ketyl for diethyl ether (Et<sub>2</sub>O), tetrahydrofuran (THF), pentane and hexane; CaH<sub>2</sub> for dichloromethane (CH<sub>2</sub>Cl<sub>2</sub>), isopropanol and methanol; and sodium for toluene. NMR spectra (<sup>1</sup>H and <sup>13</sup>C) were measured on a Bruker AV 400 MHz. High resolution mass spectra were recorded on a JEOL JMS SX/SX102A four sector mass spectrometer; for FAB-MS 3-nitrobenzyl alcohol was used as matrix. UV/VIS spectroscopy experiments were performed on a HP 8453 UV/Visible System. Gel-permeation chromatography (GPC) was performed on a Shimadzu LC-20AD system with PLgel two 5μm MIXED-C column (Polymer Laboratories) with a Shimadzu RID-10A refractive index detector. Elemental analyses were carried out by Mikroanalytisch Laboratorium Dornis und Kolbe, Mülheim an der Ruhr (Germany). All reagents were purchased from commercial suppliers and used without further purification. 1-mesitylimidazole was synthesized according to published

procedure [Arduengo, A.; Harlow, R.; Kline, M. *J. Am. Chem. Soc.* **1991**, *113*, 361-363].

### Synthesis of compounds 1, 2, 4, 5A and 5B.

#### ***N*-mesityl-*N'*-(3-pyridylmethyl)imidazolium chloride (1)**

3-(Chloromethyl)pyridine hydrobromide (1.76 g, 10.75 mmol) was neutralised using a saturated aqueous solution of sodium carbonate. The liberated 3-chloromethylpyridine was extracted into diethyl ether ( $3 \times 50 \text{ cm}^3$ ) at 0 °C, dried with magnesium sulfate and filtered. The filtrate was concentrated until a volume of 75 ml approximately. 1-mesitylimidazole (1g, 5.37 mmol) in THF ( $50 \text{ cm}^3$ ) at 0 °C was added, the ether removed under reduced pressure and the solution was warmed to room temperature and then refluxed for seven days. After cooling, the solid precipitated was filtered, washed with diethyl ether and dried under vacuum. White solid. Yield: 1.095g, 65%.  $^1\text{H-NMR}$  ( $\text{CDCl}_3$ , 400 MHz):  $\delta$  2.07 (s, 6H, 2  $\text{CH}_3$ ), 2.35 (s, 3H,  $\text{CH}_3$ ), 6.25 (s, 2H,  $\text{CH}_2$ ), 7.01 (s, 2H, 2 H arom), 7.14 (s, 1H, =CH), 7.54 (dd,  $J_{\text{HH}} = 8, 5 \text{ Hz}$ , 1H, py), 8.05 (m, 1H, =CH), 8.66 (dd,  $J_{\text{HH}} = 5, 2 \text{ Hz}$ , 1H, py), 8.70 (dt,  $J_{\text{HH}} = 8, 2 \text{ Hz}$ , 1H, py), 9.16 (d,  $J_{\text{HH}} = 2 \text{ Hz}$ , 1H, py), 10.95 (s, 1H, NCHN).  $^{13}\text{C-NMR}$  ( $\text{CDCl}_3$ , 100.6 MHz):  $\delta$  17.4 (2 Me), 20.9 (Me), 50.4 ( $\text{CH}_2$ ), 122.9 (=CH), 123.3 (=CH), 124.1 (CH arom), 129.7 (2 CH arom), 130.0 ( $\text{C}_q$  arom), 130.5 ( $\text{C}_q$  arom), 133.9 (2  $\text{C}_q$  arom), 137.2 (CH arom), 138.3 (NCN), 141.1 ( $\text{C}_q$  arom), 149.8 (CH arom), 150.4 (CH arom). HRMS (FAB):  $m/z$ , 278.1653,  $[\text{M}]^+$  (exact mass calculated for  $\text{C}_{18}\text{H}_{20}\text{N}_3$ : 278.1657).

**[N-mesityl-*N'*-(3-pyridylmethyl)imidazol-2-ylidene] silver chloride (2).**

*N*-mesityl-*N'*-(3-pyridylmethyl)imidazolium chloride (**1**) (200 mg, 0.64 mmol) and Ag<sub>2</sub>O (74 mg, 0.32 mmol) were mixed in DCM (30 mL) and heated to 40 °C for 3 hours. After cooling down the reaction mixture was filtered through celite and dried over MgSO<sub>4</sub>. The volatiles were removed under reduced pressure and the solid product was washed with diethyl ether and dried *in vacuo*. Yellow solid. Yield: 240 mg, 90%. <sup>1</sup>H-NMR (CD<sub>2</sub>Cl<sub>2</sub>, 400 MHz): δ 2.06 (s, 6H, 2 CH<sub>3</sub>), 2.40 (s, 3H, CH<sub>3</sub>), 5.49 (s, 2H, CH<sub>2</sub>), 7.07 (s, 2H, 2 H arom), 7.08 (d, *J*<sub>HH</sub> = 4 Hz, 1H, =CH), 7.20 (d, *J*<sub>HH</sub> = 4 Hz, 1H, =CH), 7.39 (dd, *J*<sub>HH</sub> = 8, 4 Hz, 1H, H arom), 7.67 (bd, *J*<sub>HH</sub> = 8 Hz, 1H, H arom), 8.61 (d, *J*<sub>HH</sub> = 8, 2 Hz, 1H, H arom), 8.64 (dd, *J*<sub>HH</sub> = 4, 2 Hz, 1H, H arom). <sup>13</sup>C-NMR (CD<sub>2</sub>Cl<sub>2</sub>, 100.6 MHz): δ 17.3 (2 Me), 20.7 (Me), 53.0 (CH<sub>2</sub>), 121.0 (CH arom), 123.6 (CH arom), 123.8 (CH arom), 129.2 (2 CH arom), 131.4 (C<sub>q</sub> arom), 134.7 (2 C<sub>q</sub> arom), 135.0 (CH arom), 135.3 (C<sub>q</sub> arom), 139.6 (C<sub>q</sub> arom), 148.7 (CH arom), 149.9 (CH arom), 181.7 (NCN). HRMS (FAB): *m/z* calcd. for C<sub>18</sub>H<sub>19</sub>N<sub>3</sub>Ag: 384.0630; found: 384.0638 [M-Cl]<sup>+</sup>. Elemental Analysis: C<sub>18</sub>H<sub>19</sub>N<sub>3</sub>AgCl (420.68): calcd. C 51.4, H 4.5, N 10.0; found C 51.3, H 4.5, N 10.1.

**[N-mesityl-*N'*-(3-pyridylmethyl)imidazol-2-ylidene] silver(I) triflate (4).**

[*N*-mesityl-*N'*-(3-pyridylmethyl)imidazol-2-ylidene] silver chloride (**2**) (200 mg, 0.47 mmol) and silver (I) triflate (125 mg, 0.48 mmol) were mixed in dichloromethane (30 mL) and stirred for 30 min in the absence of light. The mixture was filtered over a short pad of celite and the solvent was removed under vacuum. The product was precipitated from a dichloromethane/Et<sub>2</sub>O mixture and washed with Et<sub>2</sub>O. White solid. Yield: 230 mg, 90%. <sup>1</sup>H-NMR (CD<sub>2</sub>Cl<sub>2</sub>, 400 MHz): δ 1.91 (bs, 6H, 2 CH<sub>3</sub>), 2.39 (s, 3H, CH<sub>3</sub>), 5.51 (bs, 2H, CH<sub>2</sub>), 6.99 (s, 2H, 2 H arom), 7.07 (bs, 1H, =CH), 7.50 (bs, 1H, H arom), 7.56

(bs, 1H, =CH), 7.80 (bs, 1H, H arom), 8.44 (bs, 1H, H arom), 9.05 (bs, 1H, H arom).  
 $^{13}\text{C}$ -NMR ( $\text{CD}_2\text{Cl}_2$ , 100.6 MHz):  $\delta$  17.4 (2 Me), 20.9 (Me), 52.0 ( $\text{CH}_2$ ), 122.7 (CH arom), 123.5 (CH arom), 125.7 (CH arom), 129.3 (2 CH arom), 134.4 ( $\text{C}_q$  arom), 134.9 (CH arom), 135.8 ( $\text{C}_q$  arom), 138.3 ( $\text{C}_q$  arom), 138.8 ( $\text{C}_q$  arom), 139.6 ( $\text{C}_q$  arom), 151.7 (CH arom), 151.8 (CH arom), (NCN not observed). Elemental analysis:  $\text{C}_{19}\text{H}_{19}\text{AgF}_3\text{N}_3\text{O}_3\text{S}$ : calcd. C 42.71, H 3.58, N 7.86; found C 42.30, H 3.92, N 7.78.

**5A:** **2** and **A** were mixed in dichloromethane and stirred for few minutes. The volatiles were removed under reduced pressure. Purple solid. Quantitative yield.  $^1\text{H}$ -NMR ( $\text{CD}_2\text{Cl}_2$ , 400 MHz):  $\delta$  1.77 (s, 6H, 2 Me), 2.30 (s, 3H, Me), 3.55 (bs, 1H, H arom), 3.71 (bs, 1H, H arom), 4.34 (s, 2H, 2 =CH), 5.94 (dd,  $J_{\text{HH}} = 8, 5$  Hz, 1H, H arom), 6.10 (d,  $J_{\text{HH}} = 2$  Hz, 1H, =CH), 6.59 (bd,  $J_{\text{HH}} = 8$  Hz, 1H, H arom), 6.75 (d,  $J_{\text{HH}} = 2$  Hz, 1H, =CH), 6.93 (s, 2H, 2 H arom), 7.70-7.80 (m, 12H, 12 H arom), 8.19 (dd, 8H, 8 H arom), 8.89 (s, 8H, 8 H arom).

**5B:** **2** and **B** were mixed in dichloromethane and stirred for few minutes. The volatiles were removed under reduced pressure. Orange solid. Quantitative yield.  $^1\text{H}$ -NMR ( $\text{CD}_2\text{Cl}_2$ , 400 MHz):  $\delta$  1.32 (s, 18H, 2  $\text{CMe}_3$ ), 1.48 (s, 18H, 2  $\text{CMe}_3$ ), 1.92 (s, 6H, 2  $\text{CH}_3$ ), 2.34 (s, 3H,  $\text{CH}_3$ ), 5.28 (s, 2H,  $\text{CH}_2$ ), 6.78 (d,  $J_{\text{HH}} = 2$  Hz, 1H, =CH), 6.90 (d,  $J_{\text{HH}} = 2$  Hz, 1H, =CH), 7.00 (s, 2H, 2 H arom), 7.10 (bs, 2H, 2 H arom), 7.33 (m, 3H, 3 H arom), 7.42 (d,  $J_{\text{HH}} = 2$  Hz, 2H, 2 H arom), 7.69 (m, 3H, 3 H arom), 8.34 (dd,  $J_{\text{HH}} = 5, 2$  Hz, 1H, H arom), 8.46 (d,  $J_{\text{HH}} = 2$  Hz, 1H, H arom), 8.85 (bs, 2H, 2 =CH). HRMS (FAB):  $m/z$  calcd for  $\text{C}_{54}\text{H}_{65}\text{AgN}_5\text{O}_2\text{Zn}$ : 986.3475; found: 986.3445  $[\text{M}-\text{Cl}]^+$ .

**GPC analysis** (Calibration against polystyrene to estimate the molecular weights)

M<sub>w</sub> = 520 [M<sub>w</sub> (**2**) = 420,68]

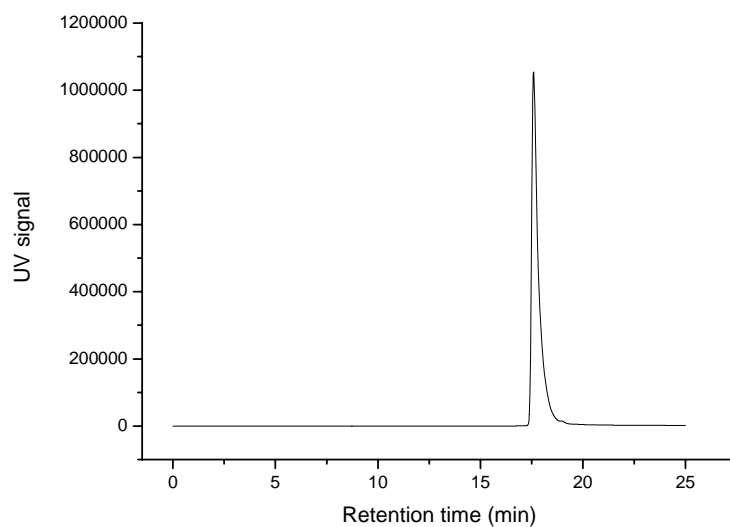

**UV/Vis absorption spectra** (dichloromethane) of **A** (purple); **2** (black); **5A** (red); excess of **2** over **5A** (green).

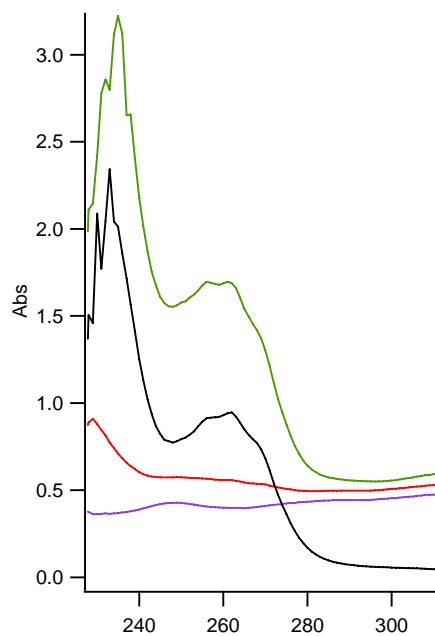

**Binding constants determinations by Uv/Vis titrations (dichloromethane, typical concentrations of host  $3 \times 10^{-5} \text{ M}^{-1}$ ):**

**5A:**

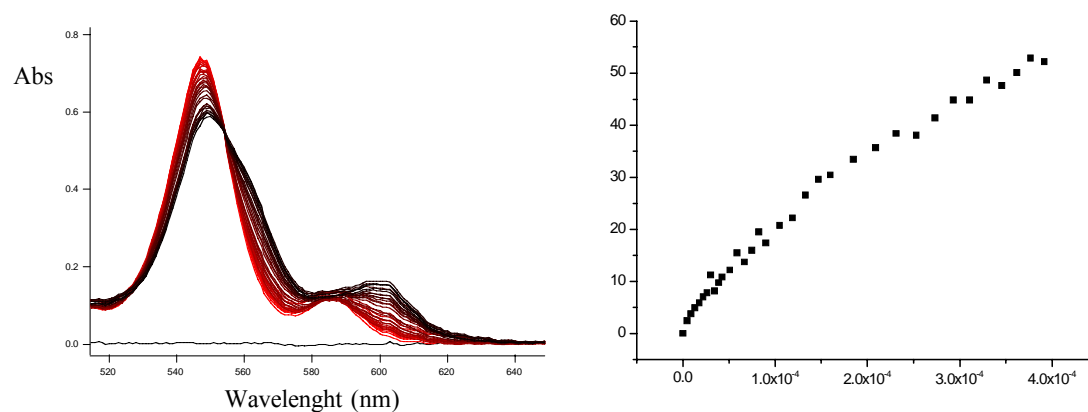

Figure: Electronic absorption spectra recorded during titration of  $\text{Zn}^{\text{II}}$ -TPP by complex **2** in dichloromethane (left). Titration curve at 565 nm (right).  $K_{\text{ass}} = 3.0 \times 10^3 \text{ M}^{-1}$ .

**5B:**

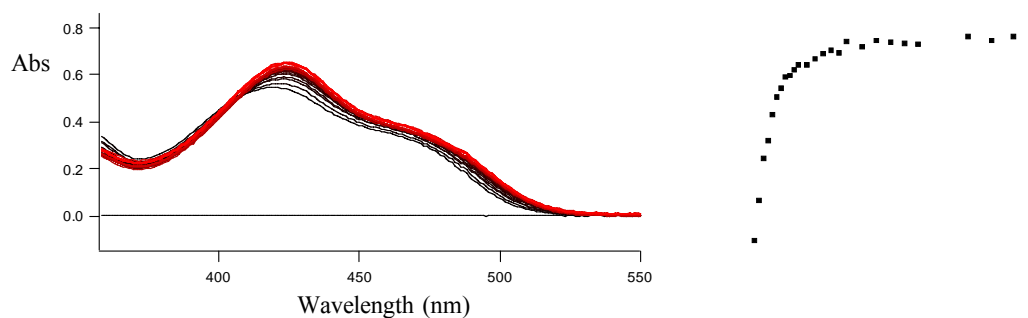

Figure: Electronic absorption spectra recorded during titration of  $\text{Zn}^{\text{II}}$ -salphen by complex **2** in dichloromethane (left). Titration curve at 565 nm (right).  $K_{\text{ass}} = 6.5 \times 10^5 \text{ M}^{-1}$ .

**Perspective of compound 4:**

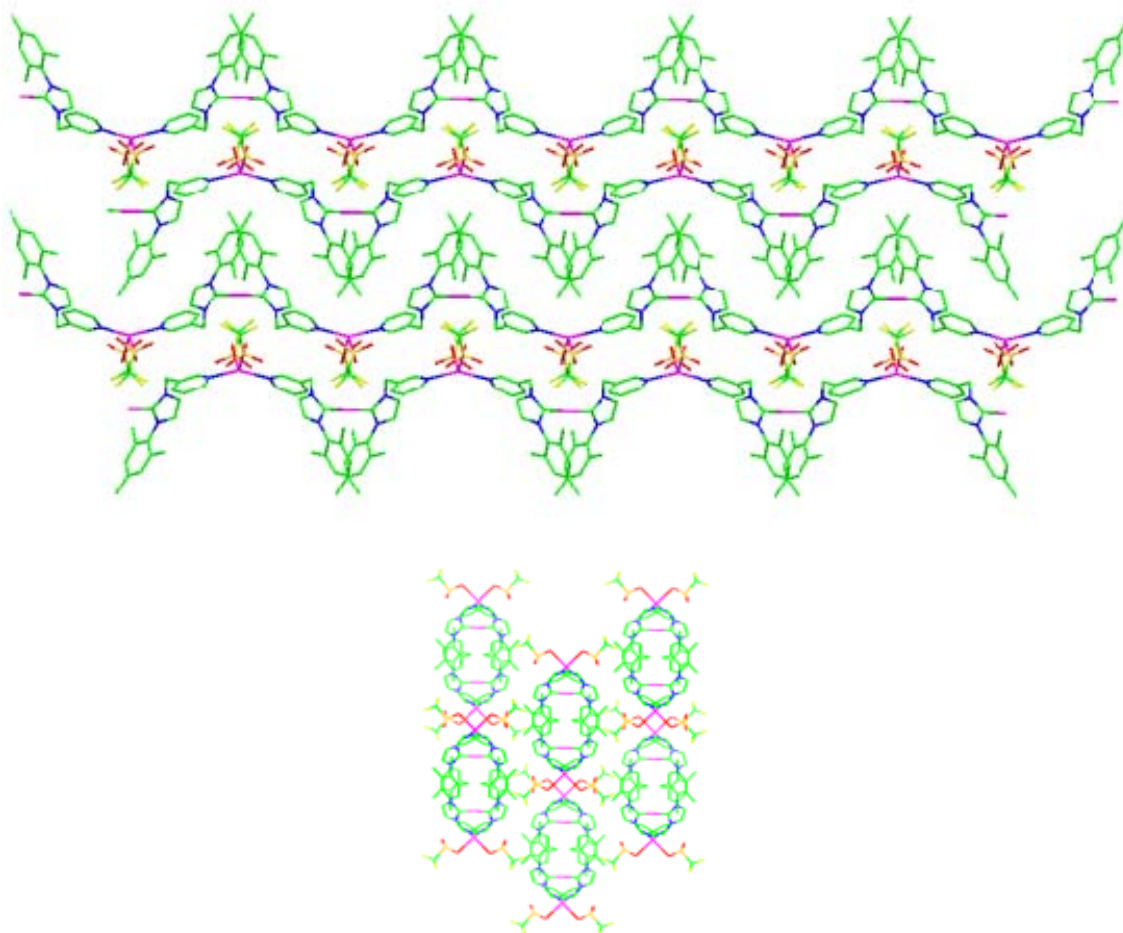

## Applications of silver complexes in catalysis:

### A) Copper-catalyzed Michael addition of $\text{ZnEt}_2$ to *trans*-chalcone:

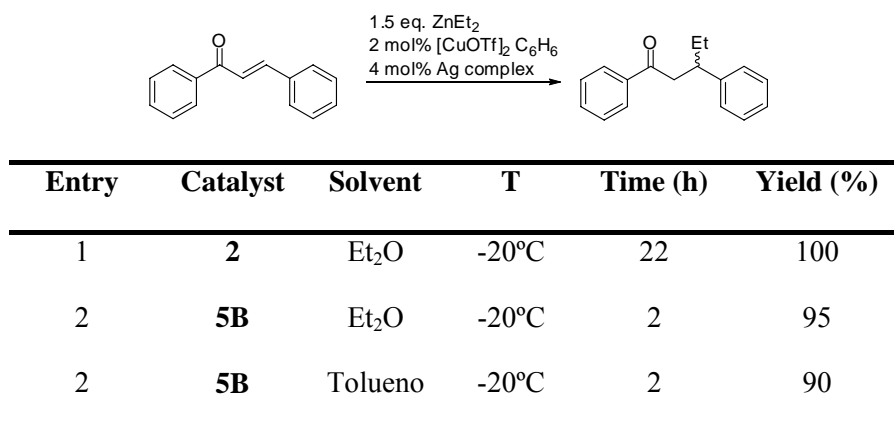

**Representative procedure:** A solution of the copper salt (5.9  $\mu\text{mol}$ ) and the silver complex (12  $\mu\text{mol}$ ) in the appropriate solvent (2 mL) was stirred for 15 minutes and cooled down to  $-20^\circ\text{C}$ . Then *trans*-chalcone (62 mg, 0.3 mmol) was added, stirred for 5 minutes and  $\text{ZnEt}_2$  (0.45 mL 1M in hexanes, 0.45 mmol) was added dropwise. The reaction was quenched with HCl 2M (2 mL) and the product was extracted with  $\text{Et}_2\text{O}$  (3 x 2 mL). The conversion was analyzed by  $^1\text{H}$ -NMR.

### B) 1,3-dipolar cycloaddition to imines:

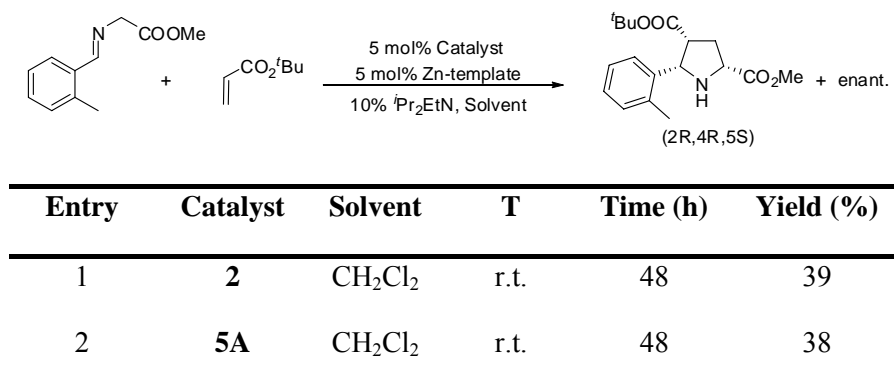

**Representative procedure:** To a suspension of *N*-(4-bromobenzylidene)glycine methyl ester (0.15 mmol, 38 mg) and the catalyst ( $7.5 \cdot 10^{-3}$  mmol, 5 mol %) in dichloromethane



(0.25 mL) was added  $i\text{-Pr}_2\text{EtN}$  (3  $\mu\text{L}$ , 0.015 mmol, 10 mol%) and the mixture was stirred in the darkness for one hour at room temperature. Then, *tert*-butyl acrylate (27  $\mu\text{L}$ , 0.18 mmol) was added and the mixture was stirred for 48 hours. Then the solvent was removed under vacuum and the residue was purified by flash chromatography (1:1  $\text{Et}_2\text{O}$ -hexane) to obtain the product as a white solid.

## Spectra:

2:

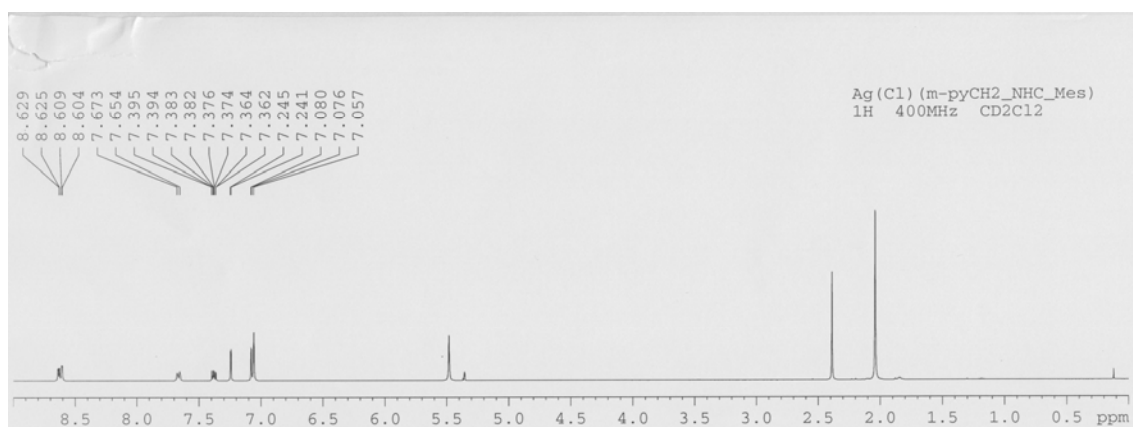

5A:

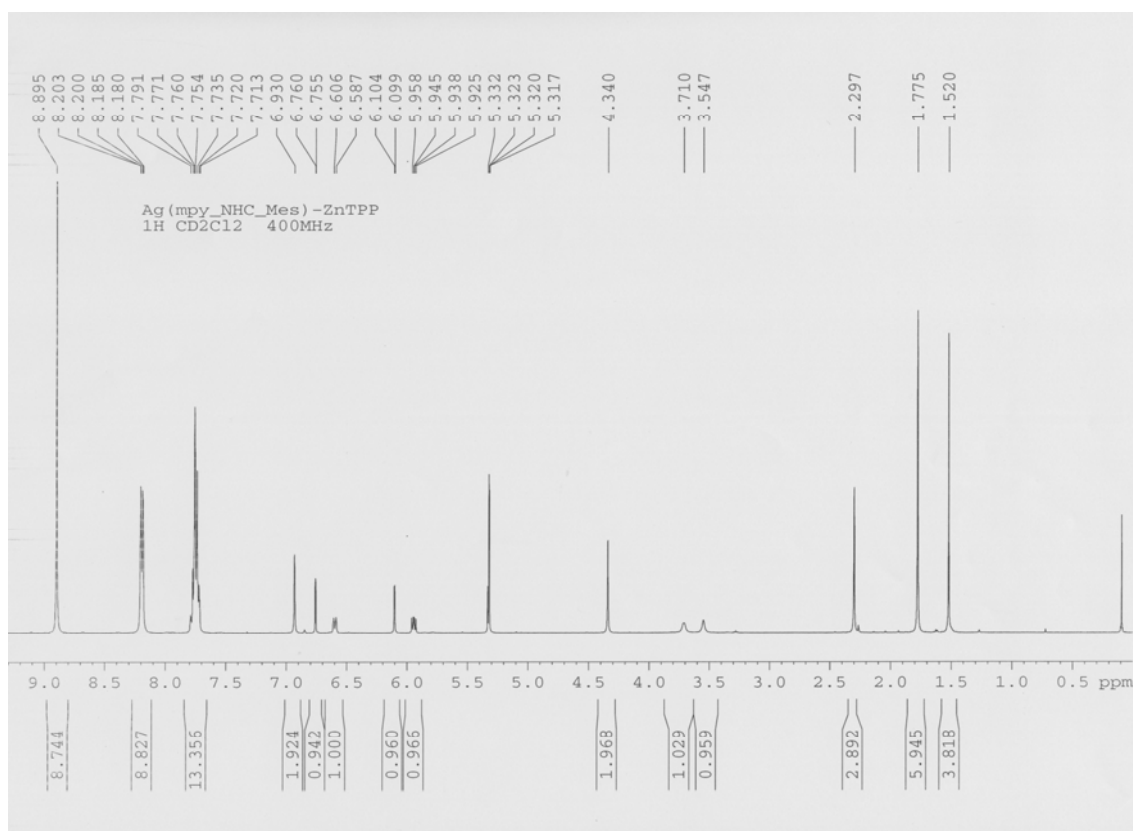

**5B:**

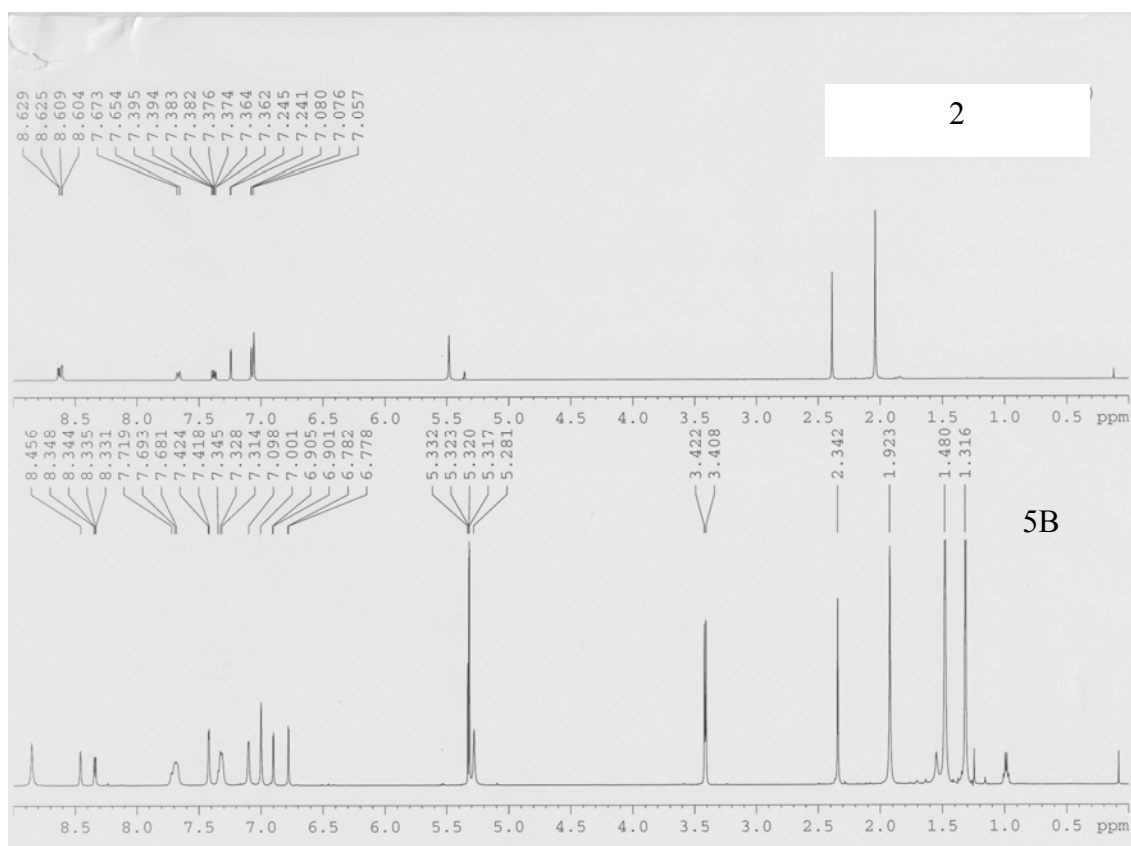

Supplement: c003352a.pdf [file c003352a.pdf]
